# Supplementary material
Source: MDPI journal article supplement (https://www.mdpi.com/2227-9717/12/3/581)
Supplement: s1 [file s1]

# Seeking Optimal Extraction Method for Augmenting *Hibiscus sabdariffa* Bioactive Compounds and Antioxidant Activity

Athanasia Kourelatou <sup>1</sup>, Theodoros Chatzimitakos <sup>2</sup>, Vassilis Athanasiadis <sup>2</sup>, Konstantina Kotsou <sup>2</sup>, Ioannis Makrygiannis <sup>2</sup>, Eleni Bozinou <sup>2</sup> and Stavros I. Lalas <sup>2,\*</sup>

<sup>1</sup> Department of Chemical Engineering, University of Western Macedonia, 50100 Kozani, Greece; athanasiak83@hotmail.com

<sup>2</sup> Department of Food Science & Nutrition, University of Thessaly, Terma N. Temponera Str., 43100 Karditsa, Greece; tchatzimitakos@uth.gr (T.C.); vaathanasiadis@uth.gr (V.A.); kkotsou@agr.uth.gr (K.K.); ioanmakr1@uth.gr (I.M.); empozinou@uth.gr (E.B.)

\* Correspondence: slalas@uth.gr; Tel.: +30-24410-64783

## 2.1. Chemicals and Reagents

All solvents were at least of HPLC grade and purchased from Carlo Erba (Valde Reuil, France). Chemical standards of polyphenolic compounds, such as 3-hydroxytyrosol, hesperidin, catechin, rutin, pelargonin chloride, luteolin-7-glucoside, cyanidin-3-O-glucoside and chlorogenic acid, were acquired from Sigma-Aldrich (Steinheim, Germany). Hydrochloric acid, ascorbic acid, trichloroacetic acid, ferric (III) chloride, aluminum chloride, and sodium acetate were also obtained from Sigma-Aldrich (Steinheim, Germany). Gallic acid, anhydrous sodium carbonate, Folin-Ciocalteu reagent, 2,2-diphenyl-1-picrylhydrazyl (DPPH), and 2,4,6-tri-2-pyridinyl-1,3,5-triazine (TPTZ) were obtained by Penta (Prague, Czech Republic). For all experiments, deionized water was used.

## 2.4. Response Surface Methodology (RSM) Optimization of Extraction and Experiment Design

Utilizing a Response Surface Methodology (RSM) approach, the total polyphenol content (TPC), and total anthocyanin content (TAC) was optimized, as well as the, antioxidant activity (evaluated through the DPPH free radical scavenging assay and the FRAP assay), total carotenoid content (TCC), and ascorbic acid content (AAC). This was achieved through adjustments to the extraction procedure involved parameters such as solvent concentration (ethanol, EtOH) represented as *C*, % *v/v*, extraction duration denoted as *t*, min, and extraction temperature indicated as *T*, °C. An experiment employing a main effects screening design with twenty design points formed the basis for optimization. Process variables were set at five levels, as outlined in Table 1, indicating both coded and actual levels. Analysis of variance (ANOVA) and summary-of-fit tests were employed to establish overall model significance (*R*<sup>2</sup>, *p*-value) and the significance of model coefficients (equations). Additionally, a second-order polynomial model (Equation 1) was utilized to forecast the dependent variable based on the analyzed independent factors:

$$Y_k = \beta_0 + \sum_{i=1}^2 \beta_i X_i + \sum_{i=1}^2 \beta_{ii} X_i^2 + \sum_{i=1}^2 \sum_{j=i+1}^3 \beta_{ij} X_i X_j \quad (S1)$$

where *X<sub>i</sub>* and *X<sub>j</sub>* represent the independent variables, and *Y<sub>k</sub>* defines the predicted response variable. The model linear, quadratic, and interaction terms are represented by the intercept and regression coefficients,  $\beta_0$ ,  $\beta_i$ ,  $\beta_{ii}$ , and  $\beta_{ij}$ , respectively.

## 2.5. HPLC-Based Determination of the Pelargonin chloride Content and Other Polyphenolic Compounds

The analysis utilized a Shimadzu CBM-20A liquid chromatograph and a Shimadzu SPD-M20A diode array detector, both provided by Shimadzu Europa GmbH in Duisburg, Germany. Separation of compounds occurred on a Phenomenex Luna C18 (2) column from Phenomenex Inc. in Torrance, CA, USA, maintained at 40°C (100 Å, 5 µm, 4.6 × 250 mm). The mobile phase comprised 0.5% aqueous formic acid (A) and a mixture of 0.5% formic acid in acetonitrile/water (6:4) (B). The gradient program employed was as follows: starting at 0% B and increasing to 40% B, followed by a transition to 50% B over 10 minutes, further increasing to 70% B in the subsequent 10 minutes, and then maintaining this level for 10 minutes. The flow rate of the mobile phase was set at 1 mL/min. Retention time and

absorbance spectrum comparisons were made against those of pure chemical standards for compound identification. Quantification was accomplished using calibration curves ranging from 0 to 50 mg/L.

## 2.6. Analyses of Extracts

### 2.6.1. Determination of Total Polyphenol Content (TPC)

The determination of TPC was also conducted according to the technique established by Chatzimitakos et al. [1]. In a 1.5 mL Eppendorf tube, 100  $\mu$ L of HS flower extracts were mixed with 100  $\mu$ L of Folin–Ciocalteu reagent. After 2 min, 800  $\mu$ L of sodium carbonate solution (5% *w/v*) was added, and the solutions were incubated for 20 min at 40 °C. The absorbance at 740 nm was measured with a Shimadzu spectrophotometer (UV-1700, Shimadzu Europa GmbH, Duisburg, Germany). Using a standard chemical, gallic acid generated a calibration curve (10–80 mg/L). The total polyphenol concentration ( $C_{TP}$ ) was expressed as mg gallic acid equivalents (GAE) per L. The TPC was expressed as mg GAE per g of dry weight (dw) using the following Equation (S2):

$$TPC \text{ (mg GAE/g dw)} = \frac{C_{TP} \times V}{w} \quad (S2)$$

where  $V$  is the volume of the extraction medium (in L) and  $w$  is the dry weight of the sample (in g).

### 2.6.2. Determination of Total Anthocyanin Content (TAC)

The TAC were determined using a previously published procedure [2]. In a 1.5-mL Eppendorf tube, 67  $\mu$ L of extract was combined with 933  $\mu$ L of hydrochloric acid solution (0.25 M in ethanol) and vortexed. After 10 min, the absorbance at 520 nm was measured using an ethanolic HCl solution as a blank. The total anthocyanin concentration ( $C_{TA}$ ) was calculated as cyanidin-3-*O*-glucoside equivalents (CyE) [2], as shown in Equation (S3):

$$C_{TA} \text{ (mg CyE/L)} = \frac{A \times MW \times F_D}{\epsilon} \times 10^3 \quad (S3)$$

where  $A$  is the absorbance at 520 nm,  $MW$  is the cyanidin-3-*O*-glucoside molecular weight (449.2),  $F_D$  is the dilution factor, and  $\epsilon=26,900$ . The TAC was then determined as follows in equation (S4):

$$TAC \text{ (mg CyE/g dw)} = \frac{C_{TA} \times V}{w} \quad (S4)$$

where  $V$  is the volume of the extraction medium (in L), and  $w$  is the dry weight of the sample (in g).

### 2.6.3. Ferric-Reducing Antioxidant Power (FRAP) Assay

A previously described method [3] was employed. The amount of 50  $\mu$ L ferric (III) chloride solution (4 mM in 0.05 M HCl) was well mixed with the diluted sample extract (50  $\mu$ L, 1:50) and then incubated in a water bath at 37 °C for 30 min. After that, 900  $\mu$ L of TPTZ solution (1 mM in 0.05 M HCl) was added, and the absorbance at 620 nm was measured after exactly 5 min. Ferric-reducing antioxidant power ( $P_R$ ) was determined as  $\mu$ mol ascorbic acid equivalents (AAE) per g of dw using an ascorbic acid calibration curve ( $C_{AA}$ , 50–500  $\mu$ mol/L in 0.05 M HCl) using the following Equation (S5):

$$P_R \text{ (}\mu\text{mol AAE/g dw)} = \frac{C_{AA} \times V}{w} \quad (S5)$$

where  $V$  is the volume of the extraction medium (in L) and  $w$  is the dry weight of the sample (in g).

### 2.6.4. DPPH Antiradical Activity Assay

The extracted polyphenols from the dried material were evaluated for their antiradical activity (AAR) using a slightly modified DPPH method, as previously established by Shehata et al [3]. In brief, 50  $\mu$ L of the sample was mixed with a quantity of 1950  $\mu$ L of a 100  $\mu$ M DPPH solution in methanol, with the solution being kept at room temperature for 30 min in the dark right after. Following that, the absorbance was measured at 515 nm. Moreover, a blank sample was used instead of the sample, including DPPH solution and methanol, with the absorbance immediately being measured. To calculate the percentage of scavenging, Equation (S6) was employed:

$$\% \text{ Scavenging} = \frac{A_{\text{control}} - A_{\text{sample}}}{A_{\text{control}}} \times 100 \quad (S6)$$

An ascorbic acid calibration curve in Equation (S7) was used to evaluate antiradical activity ( $A_{AR}$ ), which was expressed as  $\mu\text{mol AAE}$  per gram of dw:

$$A_{AR} (\mu\text{mol AAE/g dw}) = \frac{C_{AA} \times V}{w} \quad (S7)$$

where  $V$  is the volume of the extraction medium (in L) and  $w$  is the dry weight of the sample (in g).

#### 2.6.5. Total Carotenoid Content (TCC) Determination

A slightly modified method introduced by Ayour et al. [4] was employed to determine the total carotenoid content (TCC) of the extracts. Briefly, a ten-fold dilution was used in the samples during their preparation, and therefore, the absorbance was recorded at 450 nm. The TCC was expressed as mg of  $\beta$ -carotene equivalents per gram of dried weight, using a calibration curve based on  $\beta$ -carotene.

#### 2.6.6. Ascorbic Acid Content (AAC)

The ascorbic acid concentration was determined using a colorimetric assay established by Dani and Jagota [5]. One hundred microliters of the extract were added to 900  $\mu\text{L}$  of 10%  $w/v$  trichloroacetic acid. After that, 500  $\mu\text{L}$  of 10% ( $v/v$ ) Folin–Ciocalteu reagent was added to the solution. The absorbance at 760 nm was measured after 10 min. A standard curve was created using ascorbic acid (10–80 mg/L).

#### 2.7. Statistical Analysis

The design of the experiment, statistical analysis related to the response surface methodology, and distribution analysis were carried out utilizing JMP® Pro 16 software from SAS (Cary, NC, USA). Analyses were conducted in triplicate, and the extraction processes were executed three times. The results are presented as average values along with the corresponding standard deviations.

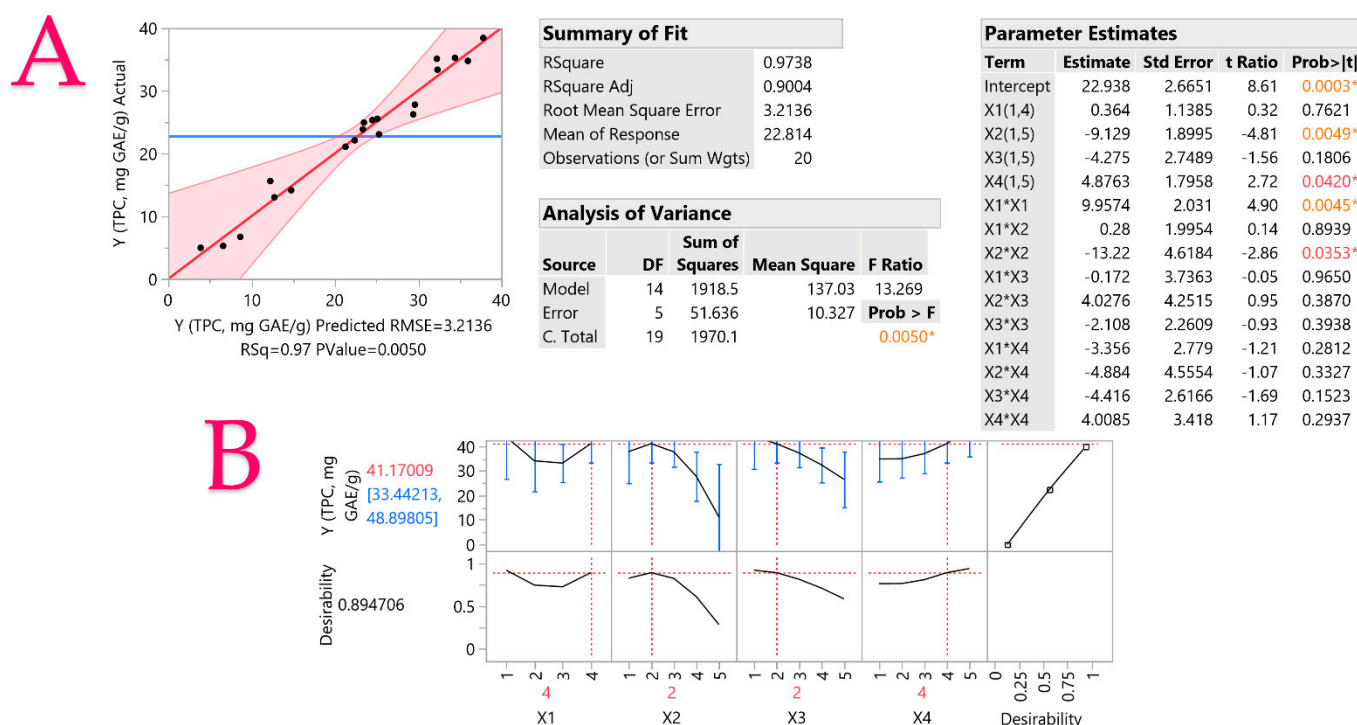

**Figure S1.** Plot **A** displays the actual response versus the predicted response (Total polyphenol content – TPC, mg GAE/g) for the optimization of *H. sabdariffa* extracts using hydroethanolic solutions, different extraction techniques, and parameters, and plot **B** displays the desirability function. Asterisks and colored values denote statistically significant values, while inset tables include statistics relevant to the evaluation of the resulting model.

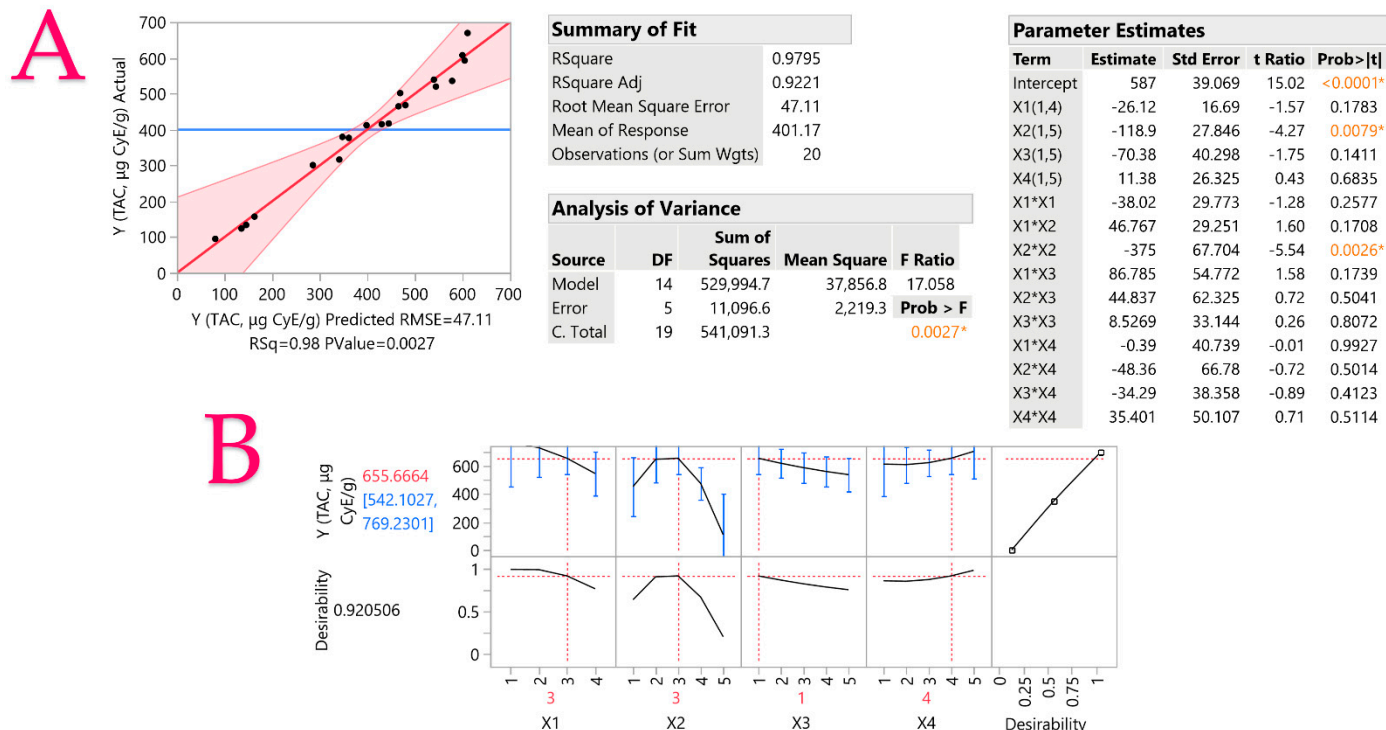

**Figure S2.** Plot **A** displays the actual response versus the predicted response (Total anthocyanin content – TAC, µg CyE/g) for the optimization of *H. sabdariffa* extracts using hydroethanolic solutions, different extraction techniques, and parameters, and plot **B** displays the desirability function. Asterisks and colored values denote statistically significant values, while inset tables include statistics relevant to the evaluation of the resulting model.

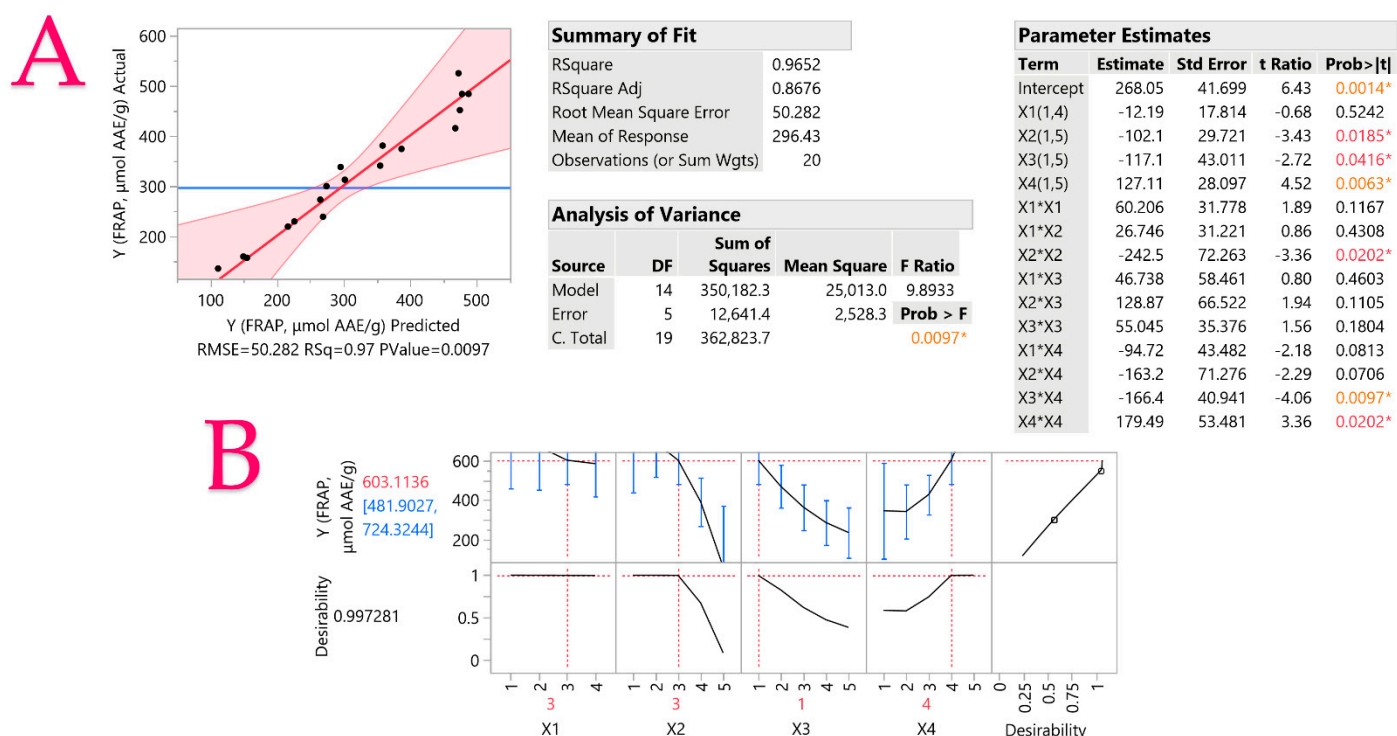

**Figure S3.** Plot **A** displays the actual response versus the predicted response (FRAP,  $\mu\text{mol AAE/g}$ ) for the optimization of *H. sabdariffa* extracts using hydroethanolic solutions, different extraction techniques, and parameters, and plot **B** displays the desirability function. Asterisks and colored values denote statistically significant values, while inset tables include statistics relevant to the evaluation of the resulting model.

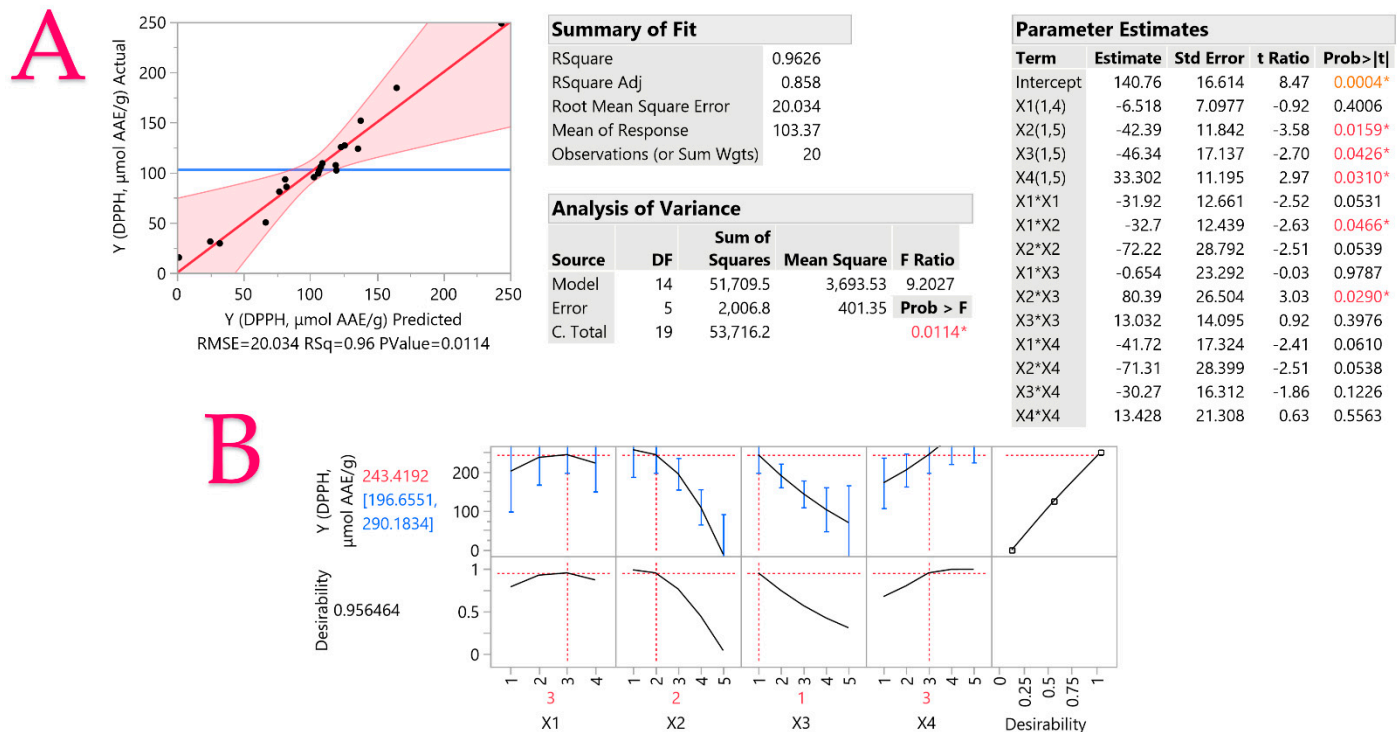

**Figure S4.** Plot **A** displays the actual response versus the predicted response (DPPH,  $\mu\text{mol AAE/g}$ ) for the optimization of *H. sabdariffa* extracts using hydroethanolic solutions, different extraction techniques, and parameters, and plot **B** displays the desirability function. Asterisks and colored values denote statistically significant values, while inset tables include statistics relevant to the evaluation of the resulting model.

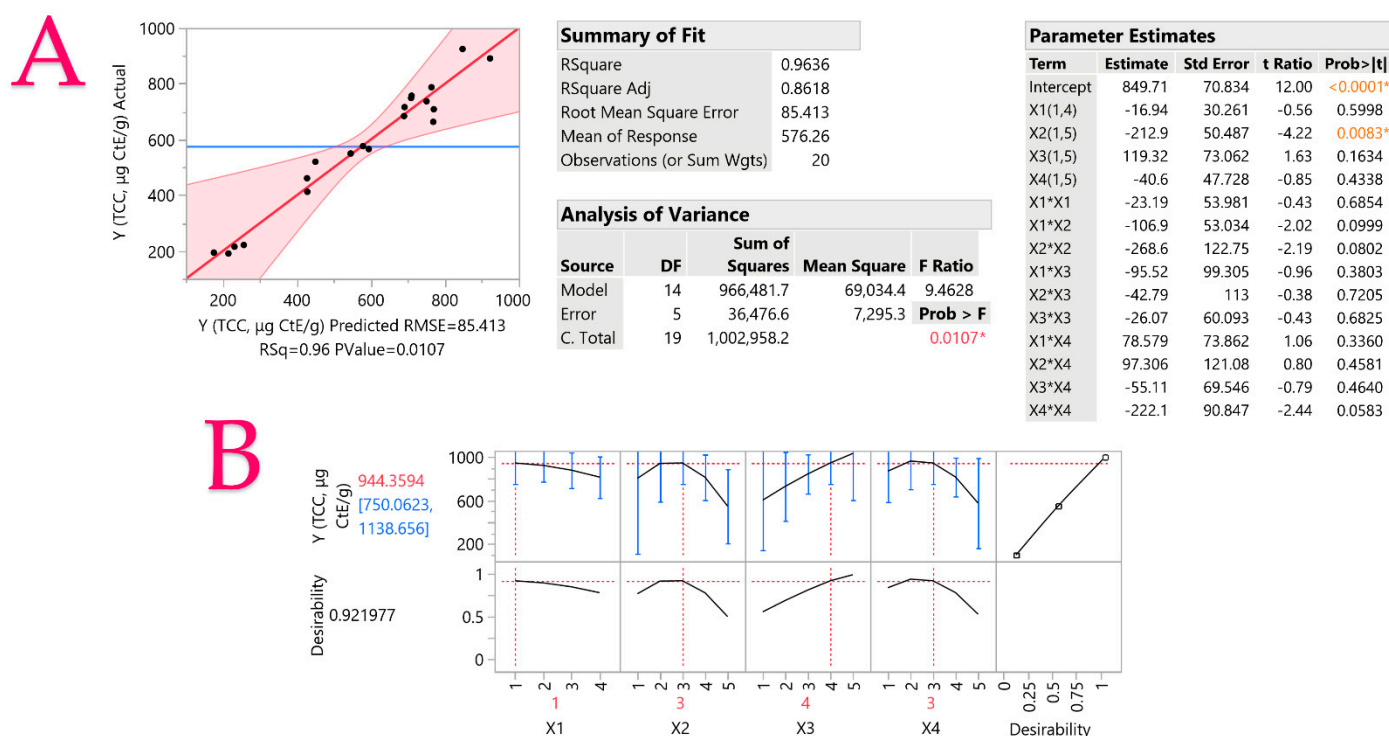

**Figure S5.** Plot **A** displays the actual response versus the predicted response (Total carotenoid content – TCC, µg CtE/g) for the optimization of *H. sabdariffa* extracts using hydroethanolic solutions, different extraction techniques, and parameters, and plot **B** displays the desirability function. Asterisks and colored values denote statistically significant values, while inset tables include statistics relevant to the evaluation of the resulting model.

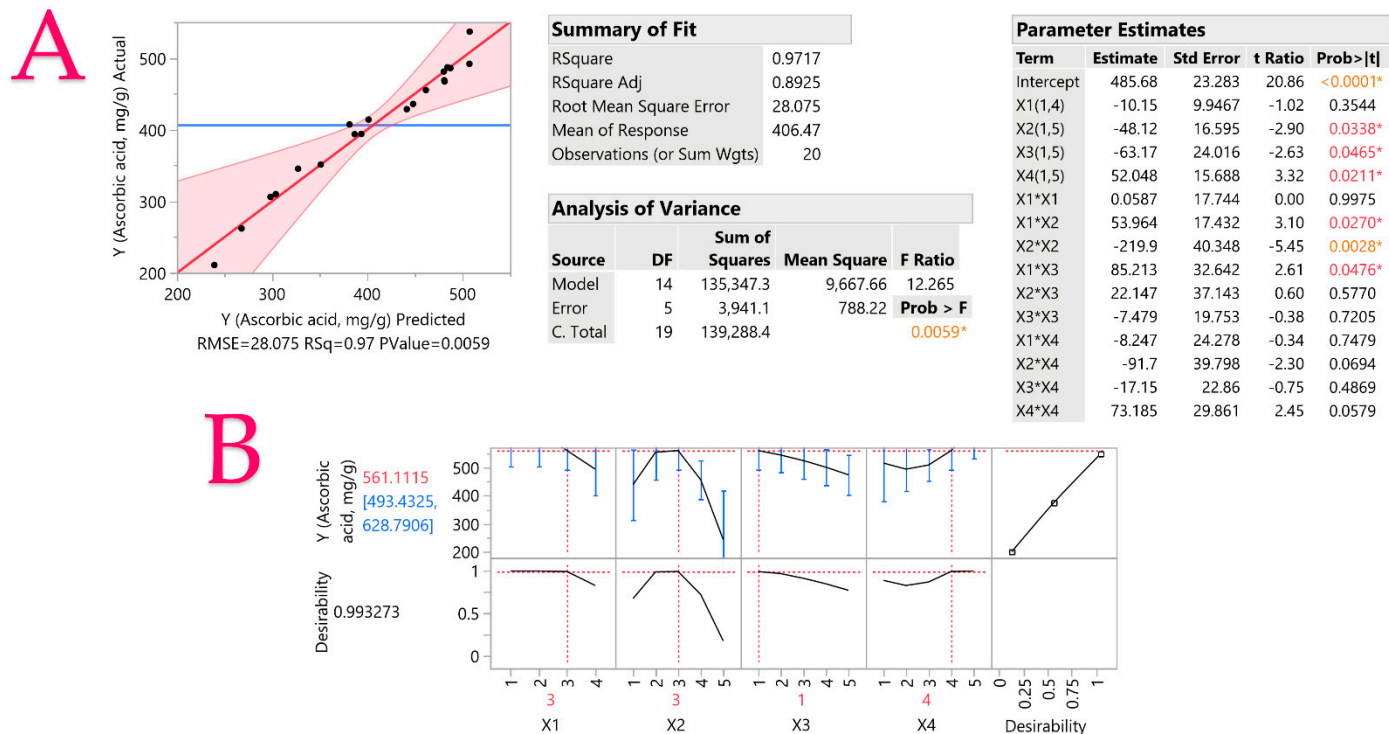

**Figure S6.** Plot **A** displays the actual response versus the predicted response (Ascorbic acid content, mg/100 g) for the optimization of *H. sabdariffa* extracts using hydroethanolic solutions, different extraction techniques, and parameters, and plot **B** displays the desirability function. Asterisks and colored values denote statistically significant values, while inset tables include statistics relevant to the evaluation of the resulting model.



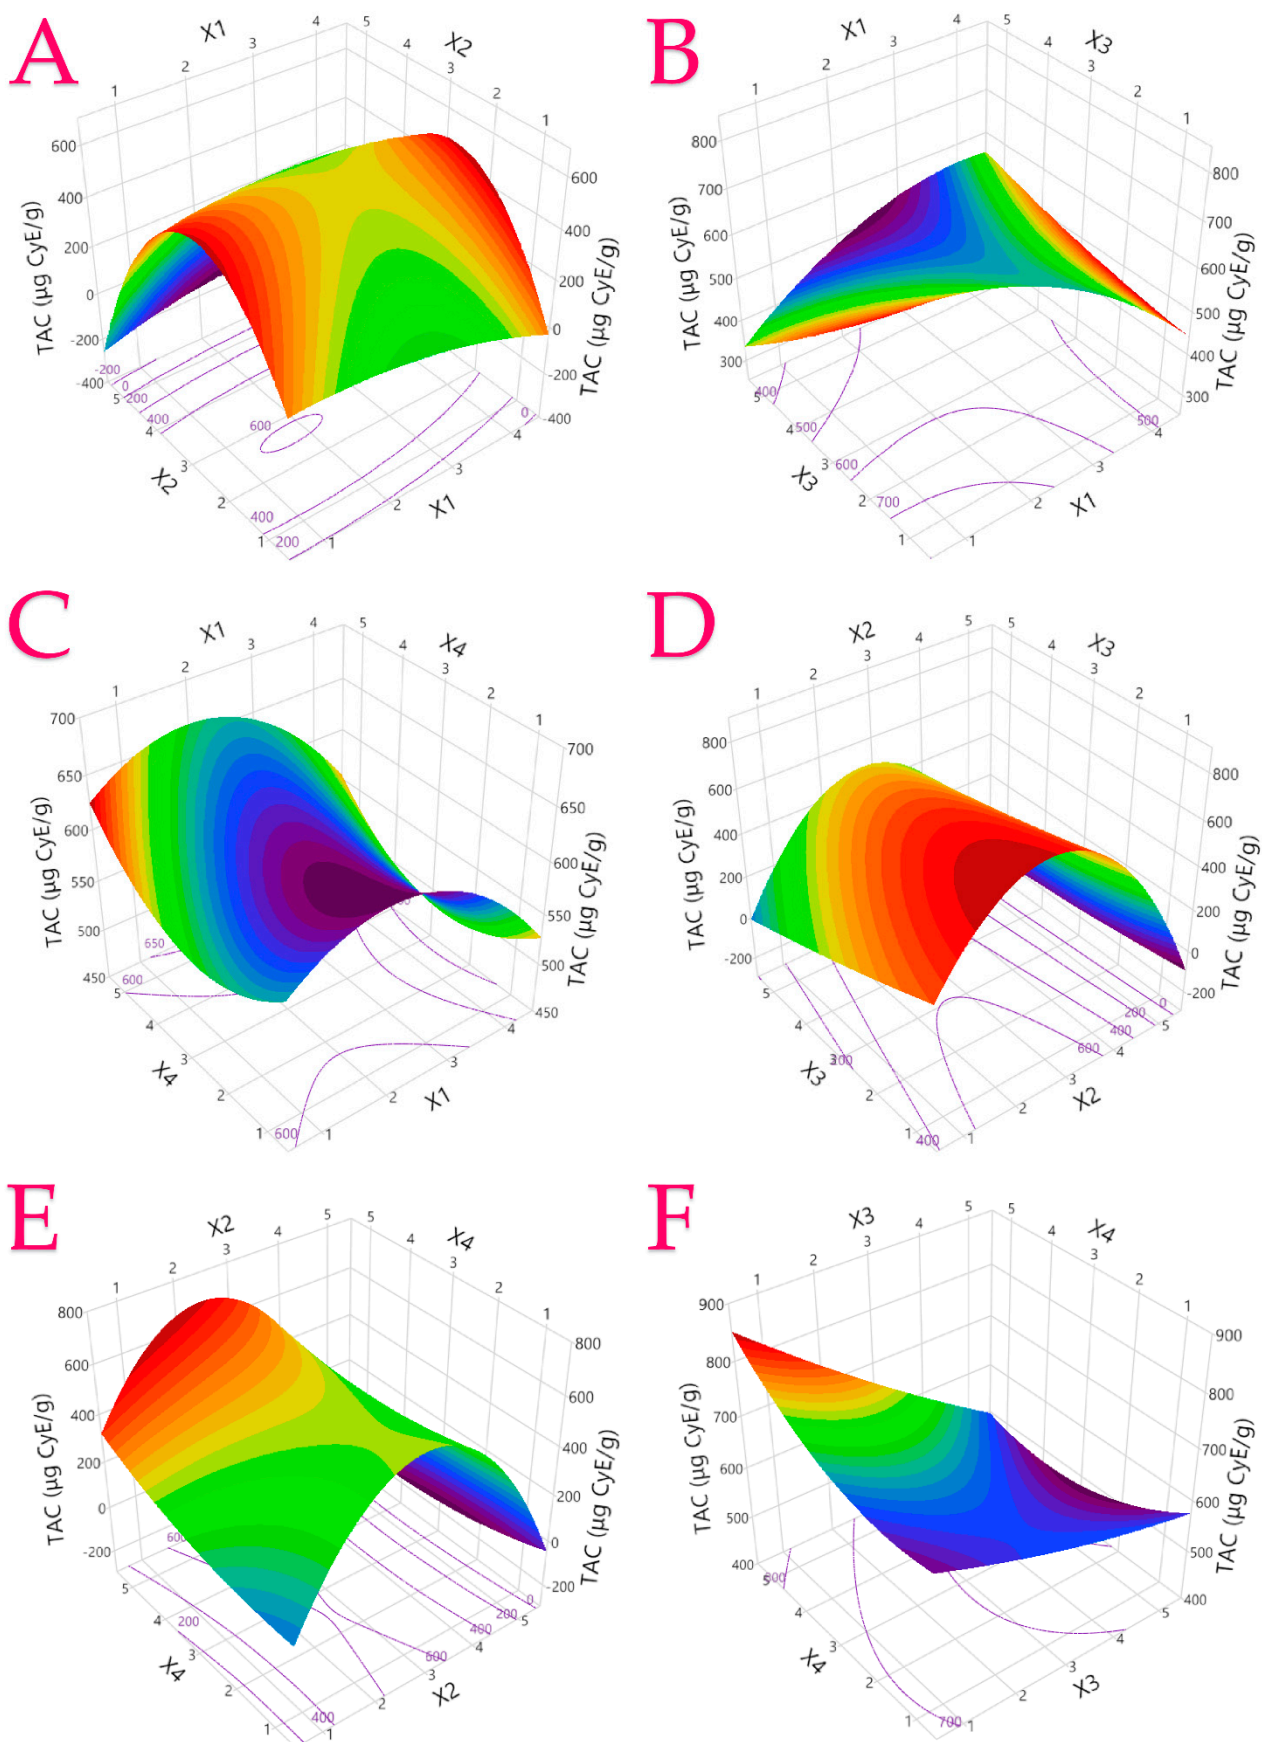

**Figure S7.** The optimal extraction of *H. sabdariffa* extracts is shown in 3D graphs that show the impact of the process variables considered in the response (Total anthocyanin content – TAC,  $\mu\text{g CyE/g}$ ). Plot (A), covariation of  $X_1$  and  $X_2$ ; plot (B), covariation of  $X_1$  and  $X_3$ ; plot (C), covariation of  $X_1$  and  $X_4$ ; plot (D), covariation of  $X_2$  and  $X_3$ ; plot (E), covariation of  $X_2$  and  $X_4$ ; plot (F), covariation of  $X_3$  and  $X_4$ .

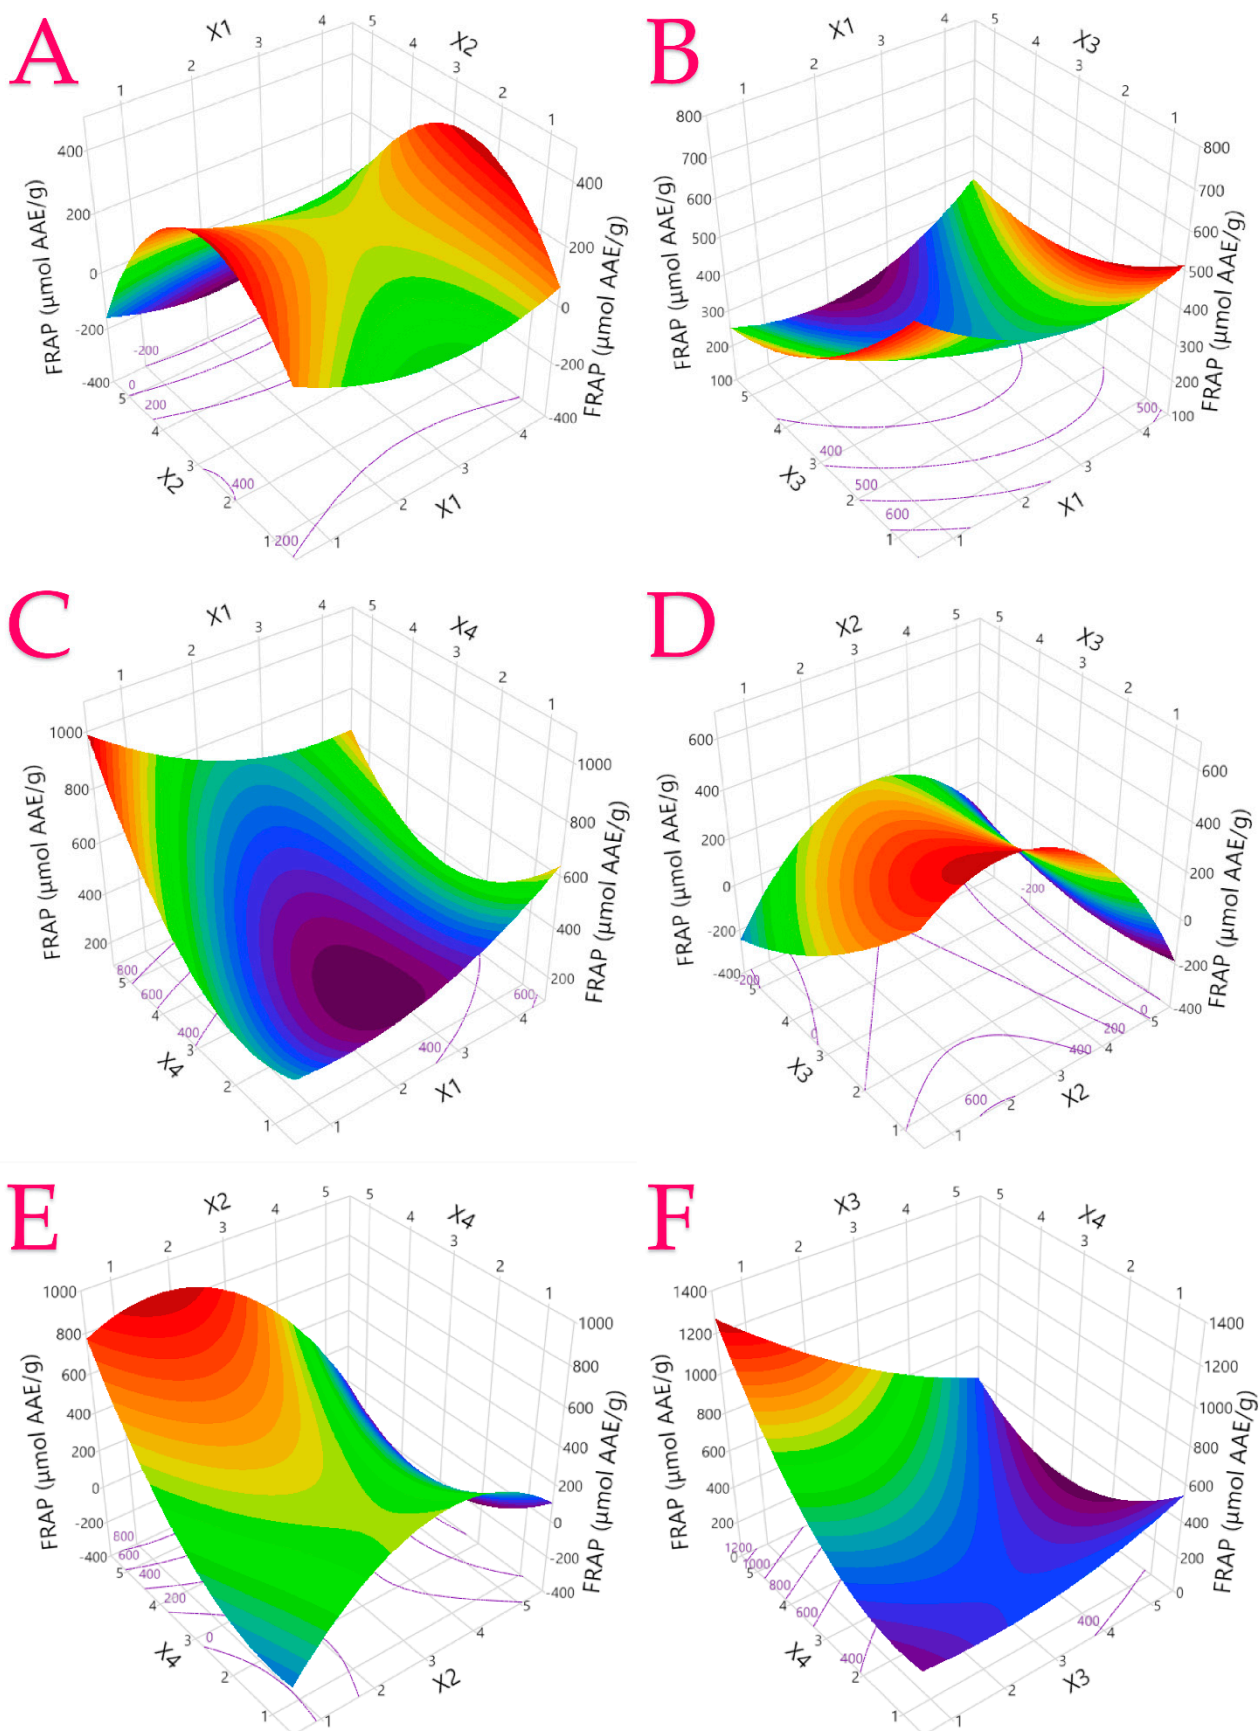

**Figure S8.** The optimal extraction of *H. sabdariffa* extracts is shown in 3D graphs that show the impact of the process variables considered in the response (FRAP,  $\mu\text{mol AAE/g}$ ). Plot (A), covariation of  $X_1$  and  $X_2$ ; plot (B), covariation of  $X_1$  and  $X_3$ ; plot (C), covariation of  $X_1$  and  $X_4$ ; plot (D), covariation of  $X_2$  and  $X_3$ ; plot (E), covariation of  $X_2$  and  $X_4$ ; plot (F), covariation of  $X_3$  and  $X_4$ .



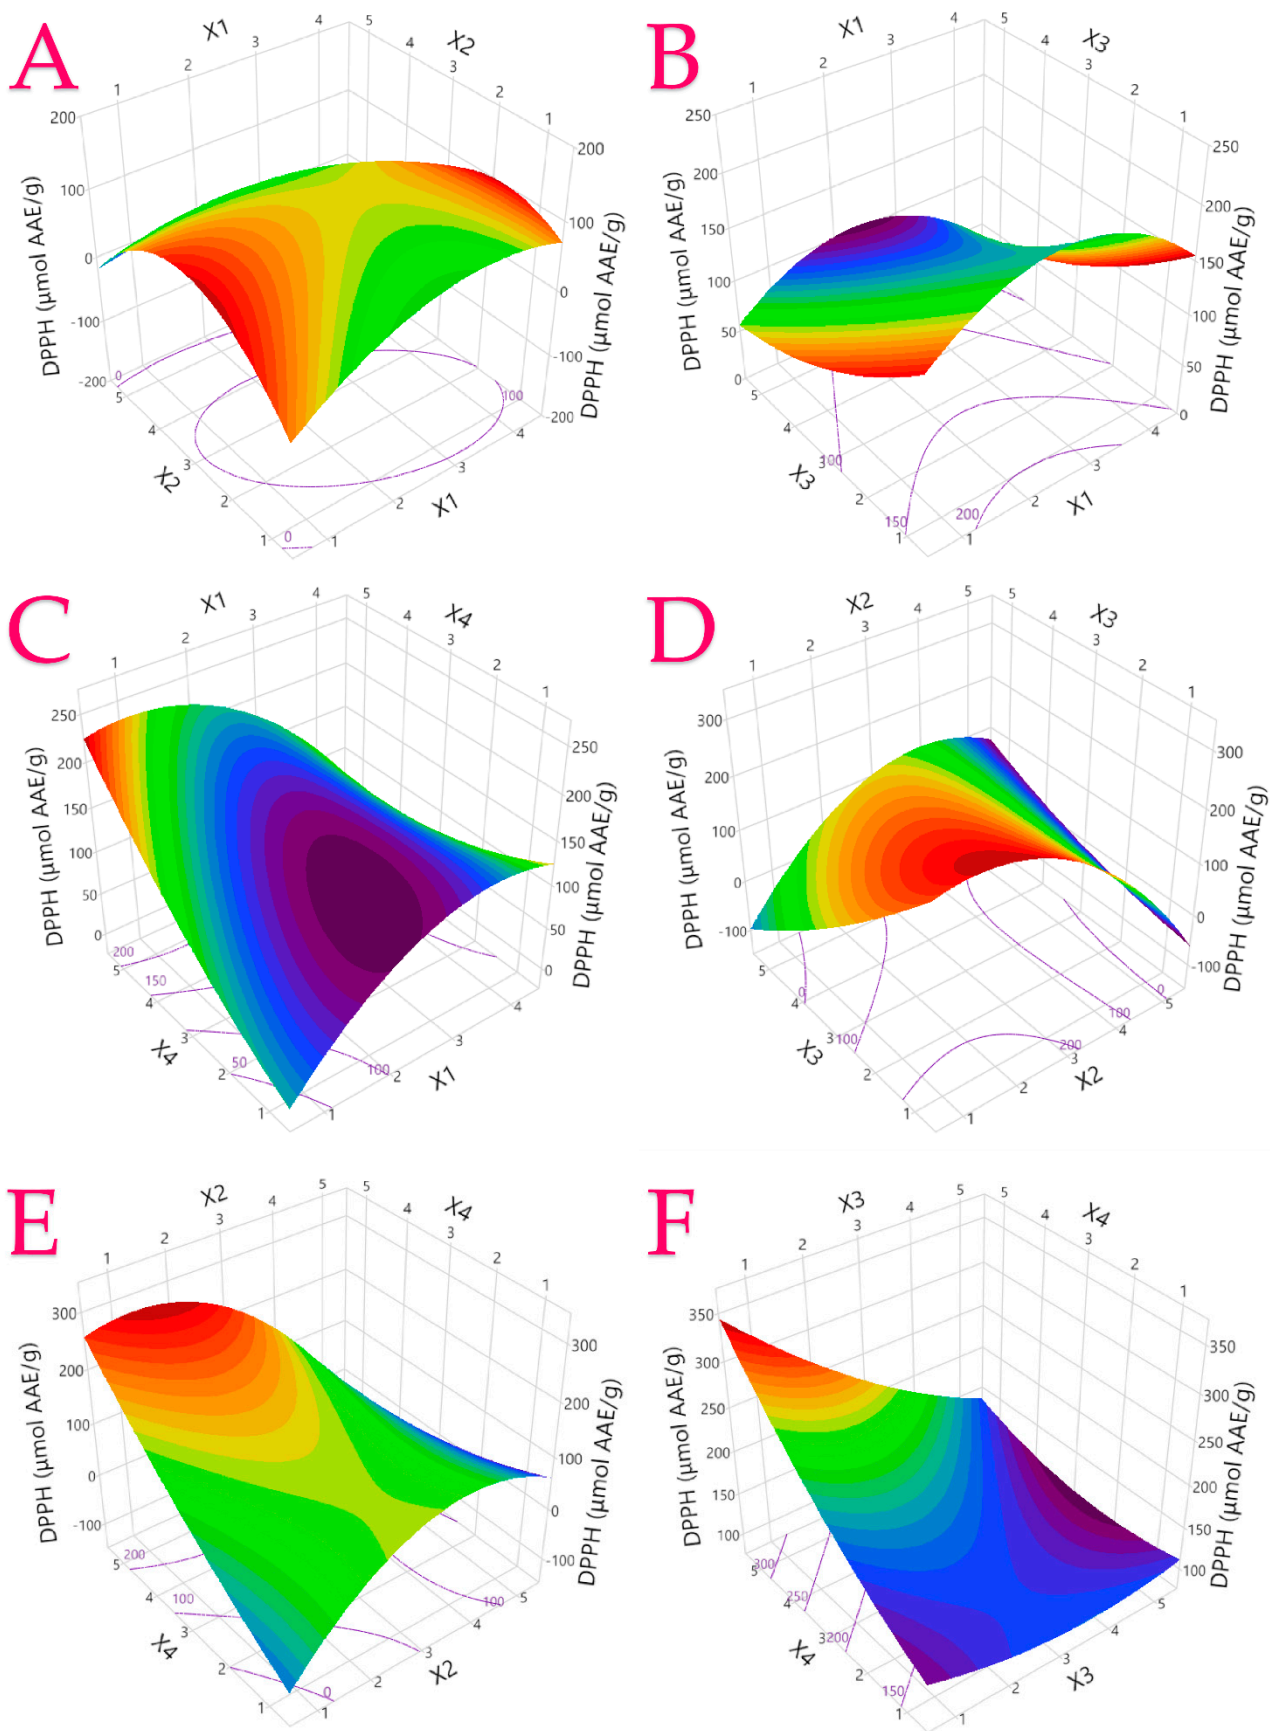

**Figure S9.** The optimal extraction of *H. sabdariffa* extracts is shown in 3D graphs that show the impact of the process variables considered in the response (DPPH,  $\mu\text{mol AAE/g}$ ). Plot (A), covariation of  $X_1$  and  $X_2$ ; plot (B), covariation of  $X_1$  and  $X_3$ ; plot (C), covariation of  $X_1$  and  $X_4$ ; plot (D), covariation of  $X_2$  and  $X_3$ ; plot (E), covariation of  $X_2$  and  $X_4$ ; plot (F), covariation of  $X_3$  and  $X_4$ .

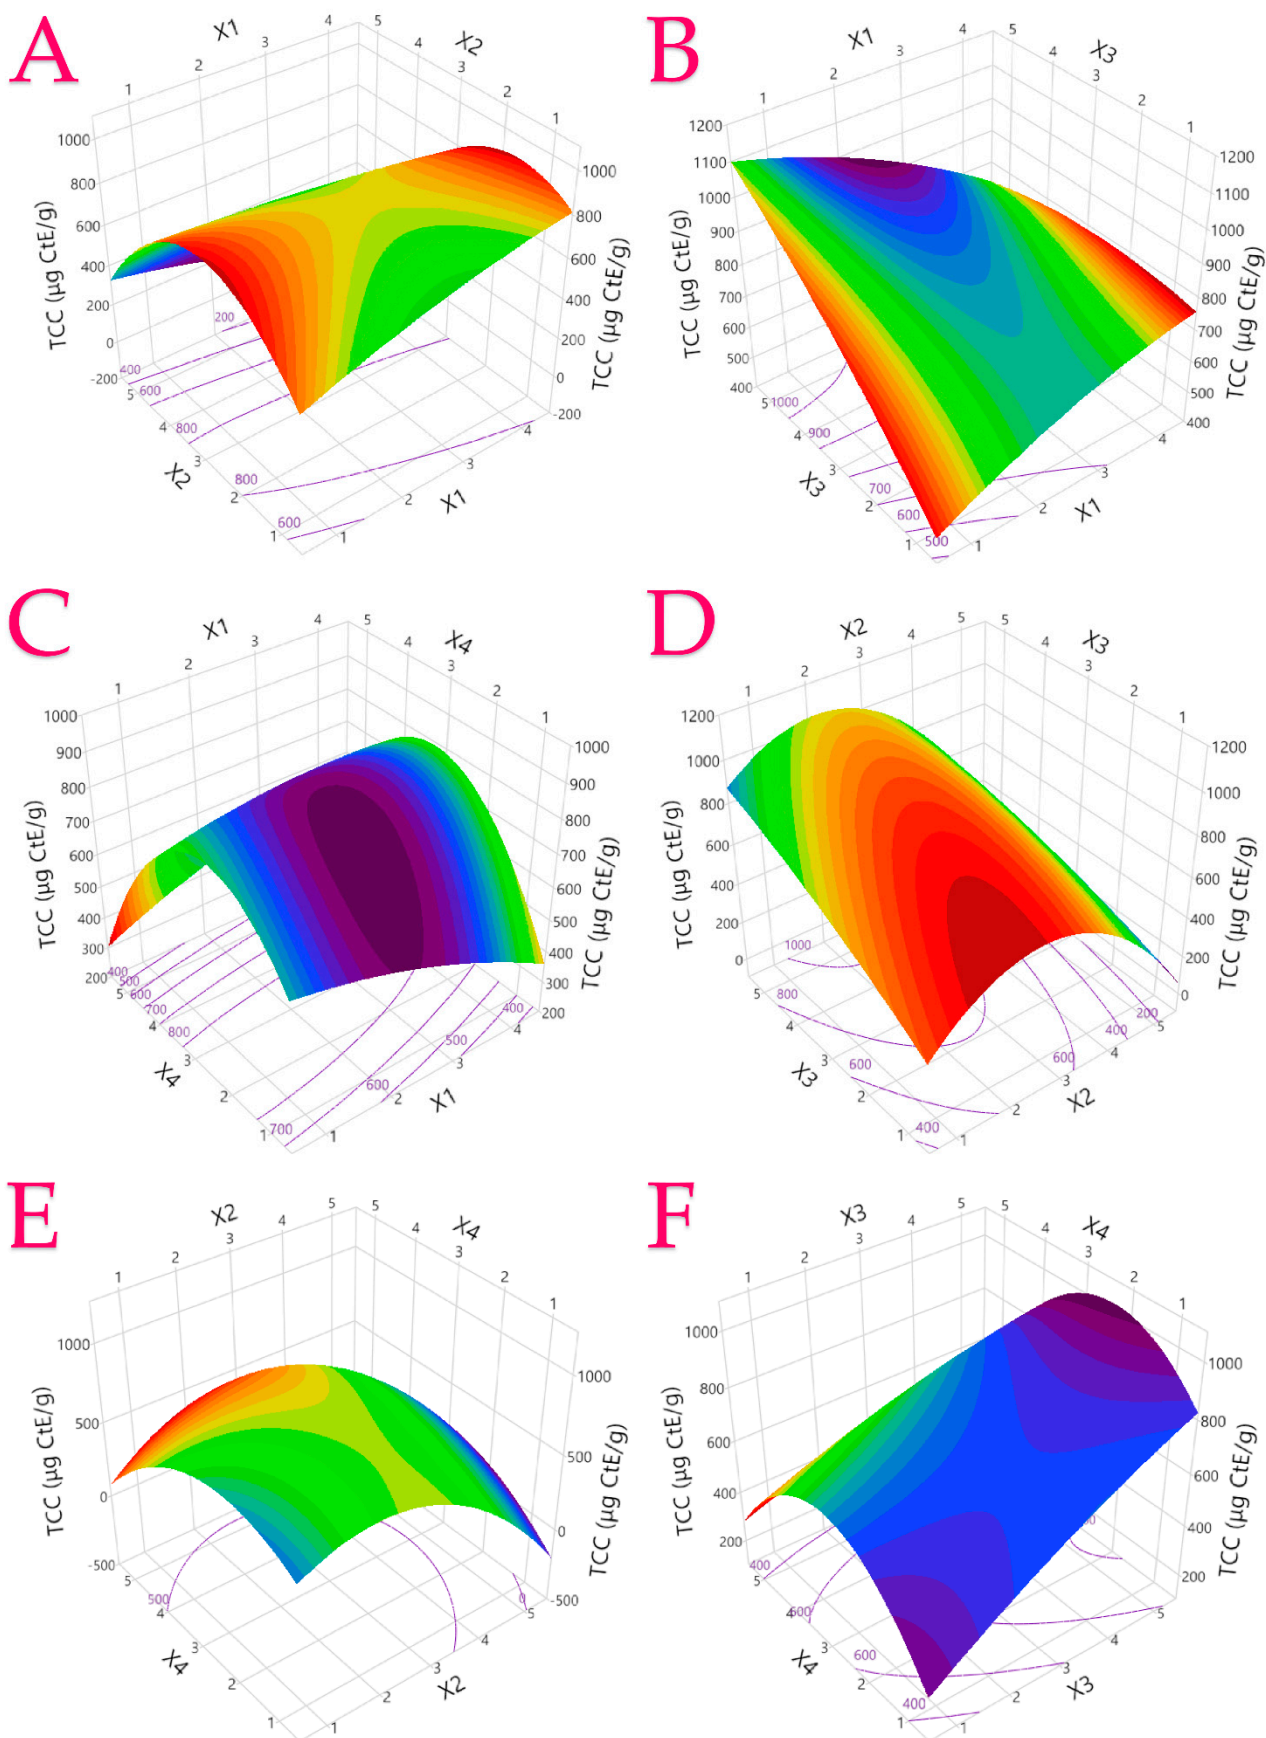

**Figure S10.** The optimal extraction of *H. sabdariffa* extracts is shown in 3D graphs that show the impact of the process variables considered in the response (Total carotenoid content – TCC,  $\mu\text{g CtE/g}$ ). Plot (A), covariation of  $X_1$  and  $X_2$ ; plot (B), covariation of  $X_1$  and  $X_3$ ; plot (C), covariation of  $X_1$  and  $X_4$ ; plot (D), covariation of  $X_2$  and  $X_3$ ; plot (E), covariation of  $X_2$  and  $X_4$ ; plot (F), covariation of  $X_3$  and  $X_4$ .

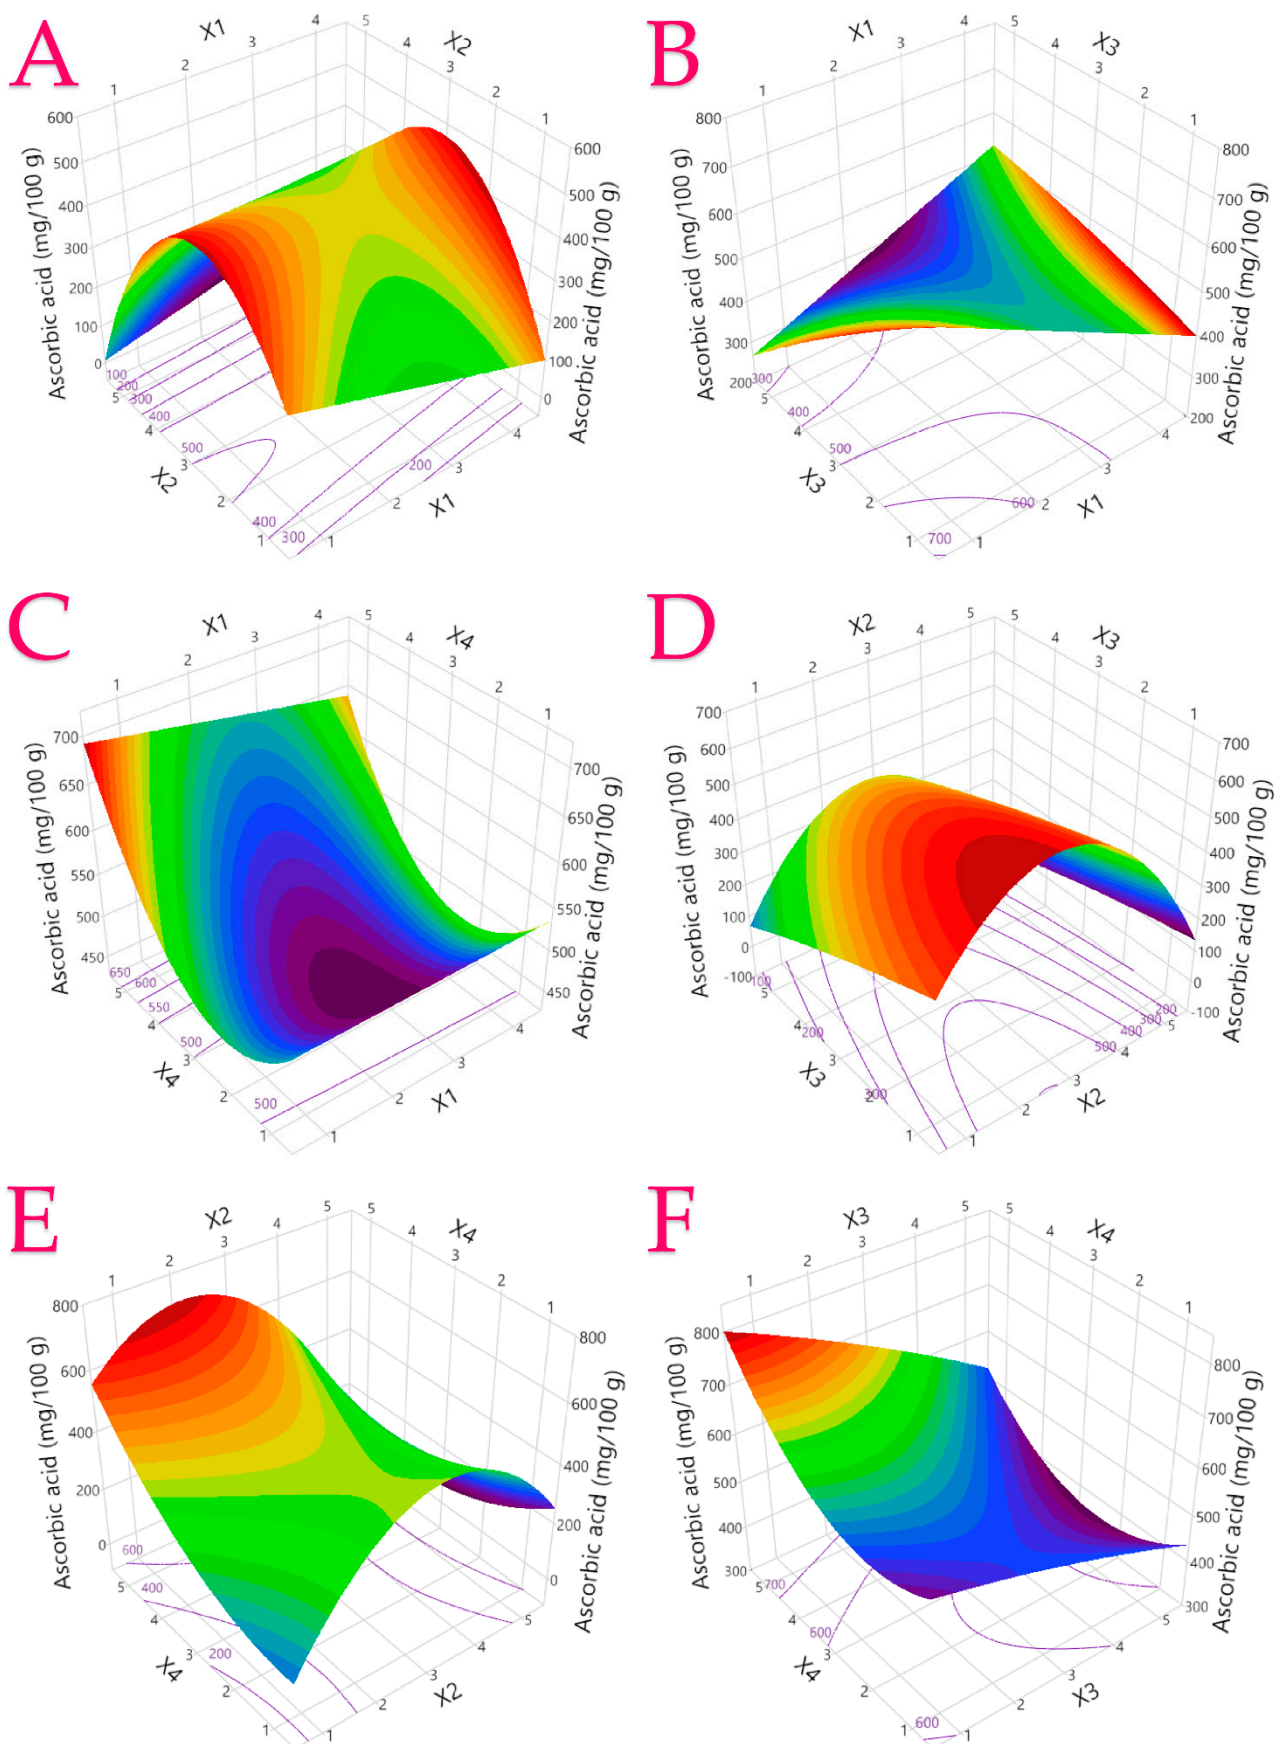

**Figure S11.** The optimal extraction of *H. sabdariffa* extracts is shown in 3D graphs that show the impact of the process variables considered in the response (Ascorbic acid content, mg/100 g). Plot (A), covariation of  $X_1$  and  $X_2$ ; plot (B), covariation of  $X_1$  and  $X_3$ ; plot (C), covariation of  $X_1$  and  $X_4$ ; plot (D), covariation of  $X_2$  and  $X_3$ ; plot (E), covariation of  $X_2$  and  $X_4$ ; plot (F), covariation of  $X_3$  and  $X_4$ .

## References

1. Chatzimitakos, T.; Athanasiadis, V.; Kotsou, K.; Bozinou, E.; Lalas, S.I. Response Surface Optimization for the Enhancement of the Extraction of Bioactive Compounds from *Citrus Limon* Peel. *Antioxidants* **2023**, *12*, 1605, doi:10.3390/antiox12081605.
2. Bozinou, E.; Lakka, A.; Poulianiti, K.; Lalas, S.; Makris, D.P. Cyclodextrins as High-Performance Green Co-Solvents in the Aqueous Extraction of Polyphenols and Anthocyanin Pigments from Solid Onion Waste. *Eur. Food Res. Technol.* **2021**, *247*, 2831–2845, doi:10.1007/s00217-021-03839-2.
3. Shehata, E.; Grigorakis, S.; Loupassaki, S.; Makris, D.P. Extraction Optimisation Using Water/Glycerol for the Efficient Recovery of Polyphenolic Antioxidants from Two *Artemisia* Species. *Sep. Purif. Technol.* **2015**, *149*, 462–469, doi:10.1016/j.seppur.2015.06.017.
4. Ayour, J.; Alahyane, A.; Harrak, H.; Neffa, M.; Taourirte, M.; Benichou, M. Assessment of Nutritional, Technological, and Commercial Apricot Quality Criteria of the Moroccan Cultivar “Maoui” Compared to Introduced Spanish Cultivars “Canino” and “Delpatriarca” towards Suitable Valorization. *J. Food Qual.* **2021**, *2021*, 6679128, doi:10.1155/2021/6679128.
5. Dani, H.M.; Jagota, S.K. A New Calorimetric Technique for the Estimation of Vitamin C Using Folin Phenol Reagent. *Anal. Biochem.* **1982**, *127*, 178–182.
